# Supplementary material
Source: MDPI journal article supplement (https://www.mdpi.com/1424-2818/13/2/53)
Supplement: s1 [file s1]

**Table S1 Ant species from NPF and NSF.** The table shows for each genus the number of morphospecies we distinguished, and gives the morphospecies IDs we used here. For the morphospecies we identified to species level, species names are given as well as the person who identified them. Genus identification and morphospecies assignment were done by Mickal Houadria based on Bolton (1995).

|                       | Number of morphospecies    | Morphospecies IDs used in this study, and identified species | Identifying person |
|-----------------------|----------------------------|--------------------------------------------------------------|--------------------|
| <i>Acanthostichus</i> | 1                          | 1                                                            |                    |
| <i>Acromyrmex</i>     | 1                          | 1                                                            |                    |
| <i>Anochetus</i>      | 1                          | <i>diegensis</i>                                             | Mickal Houadria    |
| <i>Apterostigma</i>   |                            | 2, 6, 7                                                      |                    |
| <i>Atta</i>           | 1                          | <i>cephalotes</i>                                            | Mickal Houadria    |
| <i>Azteca</i>         | 1                          | 2                                                            |                    |
| <i>Brachymyrmex</i>   | 1                          | 1                                                            |                    |
| <i>Camponotus</i>     | 8                          | 1, 2, 3, 4, 5, 6, 10, 11                                     |                    |
|                       | <i>Camponotus</i> sp. 2    | cf. <i>melanoticus</i>                                       | Félix Rosumek      |
|                       | <i>Camponotus</i> sp. 5    | <i>femoratus</i>                                             | Florian Menzel     |
| <i>Carebara</i>       | 2                          | 1, 2                                                         |                    |
| <i>Cephalotes</i>     | 2                          | 1, 3                                                         |                    |
| <i>Cerapachys</i>     | 1                          | 2                                                            |                    |
| <i>Crematogaster</i>  | 6                          | 1, 2, 3, 4, 5, 7                                             |                    |
|                       | <i>Crematogaster</i> sp. 1 | <i>limata</i>                                                | Bonnie Blaimer     |
|                       | <i>Crematogaster</i> sp. 2 | <i>levior</i> complex                                        | Bonnie Blaimer     |
|                       | <i>Crematogaster</i> sp. 5 | <i>flavosensitiva</i>                                        | Bonnie Blaimer     |
| <i>Cyphomyrmex</i>    | 4                          | 1, 2, 3, 7                                                   |                    |
| <i>Daceton</i>        | 1                          | 1                                                            |                    |
| <i>Dolichoderus</i>   | 1                          | 1                                                            |                    |
| <i>Dyscothyrea</i>    | 1                          | 1                                                            |                    |
| <i>Eciton</i>         | 1                          | 1                                                            |                    |
| <i>Ectatomma</i>      | 3                          | 1, 4, 6                                                      |                    |
|                       | <i>Ectatomma</i> sp. 4     | <i>tuberculatum</i>                                          | Florian Menzel     |
| <i>Forelius</i>       | 1                          | 1                                                            |                    |
| <i>Gnamptogenys</i>   | 4                          | 1, 2, 4, 6                                                   |                    |
| <i>Hylomyrma</i>      | 1                          | 1                                                            |                    |
| <i>Hypoponera</i>     | 7                          | 1, 2, 3, 4, 6, 11, 13                                        |                    |
| <i>Labidus</i>        | 2                          | 1, 2                                                         |                    |
| <i>Leptanilla</i>     | 1                          | 1                                                            |                    |
| <i>Mayaponera</i>     | 1                          | 3                                                            |                    |
| <i>Myrmicocrypta</i>  | 2                          | 1, 2                                                         |                    |
| <i>Nylanderia</i>     | 4                          | 1, 2, 5, 6                                                   |                    |
| <i>Ochetomyrmex</i>   | 1                          | 1                                                            |                    |
| <i>Octostruma</i>     | 2                          | 2, 4                                                         |                    |
| <i>Odontomachus</i>   | 3                          | 1, 3, 4                                                      |                    |
|                       | <i>Odontomachus</i> sp. 1  | <i>haematodus</i>                                            | Mickal Houadria    |
| <i>Pachycondyla</i>   | 6                          | 1, 2, 3, 4, 9, 10                                            |                    |
|                       | <i>Pachycondyla</i> sp. 1  | <i>crassinoda</i>                                            | Mickal Houadria    |
| <i>Parvaponera</i>    | 1                          | 1                                                            |                    |

|                       |                        |                                                                                                                                                              |              |
|-----------------------|------------------------|--------------------------------------------------------------------------------------------------------------------------------------------------------------|--------------|
| <i>Pheidole</i>       | 45                     | 1,2,3,4,5,6,<br>7,9,10,11,12,14,15,16,1<br>7,18,19,21,24,27,28,29,<br>30,31,32,34,35,36,37,38<br>,42, 43, 44, 45, 47, 48,<br>49, 52,<br>53,54,56,61,62,63,64 |              |
|                       | <i>Pheidole</i> sp. 3  | <i>subarmata</i>                                                                                                                                             | John Longino |
|                       | <i>Pheidole</i> sp. 5  | <i>aripoensis</i>                                                                                                                                            | John Longino |
|                       | <i>Pheidole</i> sp. 7  | <i>nitella</i>                                                                                                                                               | John Longino |
|                       | <i>Pheidole</i> sp. 10 | <i>zeteki</i>                                                                                                                                                | John Longino |
|                       | <i>Pheidole</i> sp. 11 | <i>pugnax</i>                                                                                                                                                | John Longino |
|                       | <i>Pheidole</i> sp. 16 | cf. <i>texticeps</i>                                                                                                                                         | John Longino |
| <i>Prionopelta</i>    | 1                      | 1                                                                                                                                                            |              |
| <i>Pseudomyrmex</i>   | 1                      | 1                                                                                                                                                            |              |
| <i>Rhopalotrix</i>    | 1                      | 1                                                                                                                                                            |              |
| <i>Rogeria</i>        | 1                      | 1, 2                                                                                                                                                         |              |
| <i>Sericomyrmex</i>   | 3                      | 1, 3, 5                                                                                                                                                      |              |
| <i>Solenopsis</i>     | 18                     | 1,2,3,4,5,7,8,9,10,11,12,<br>13,14,15,16,1-D,2-D,3-D                                                                                                         |              |
| <i>Strumigenys</i>    | 11                     | 1,2,3,4,6,7,8,9,10,11,12                                                                                                                                     |              |
| <i>Tapinoma</i>       | 1                      | 1                                                                                                                                                            |              |
| <i>Thaumatomyrmex</i> | 1                      | 1                                                                                                                                                            |              |
| <i>Trachymyrmex</i>   | 4                      | 1, 2, 4, 6                                                                                                                                                   |              |
| <i>Wasmannia</i>      | 1                      | 1                                                                                                                                                            |              |

---

**Table S2 Ant species from PPF and PSF.** The table shows for each genus the number of morphospecies we distinguished, and gives the morphospecies IDs we used here. For the morphospecies we identified to species level, species names are given as well as the person who identified them and the key used, if different from the others. Genus identification and morphospecies assignment were done by Mickal Houadria based on Bolton (1995).

|                       | Number of morphospecies  | Morphospecies IDs used in this study, and identified species | Identifying person and key          |
|-----------------------|--------------------------|--------------------------------------------------------------|-------------------------------------|
| <i>Acropyga</i>       | 2                        | 1, 2                                                         |                                     |
| <i>Aenictus</i>       | 2                        | 1, 2                                                         |                                     |
| <i>Aphaenogaster</i>  |                          | 1, 2, 3, 4                                                   |                                     |
| <i>Camponotus</i>     | 7                        | 2, 3, 4, 6, 9, 10, 11                                        |                                     |
| <i>Carebara</i>       | 9                        | 1-Pheig, 1, 2, 3, 4, 5, 6, 7, 8                              |                                     |
| <i>Cataulacus</i>     | 2                        | 1, 2                                                         |                                     |
| <i>Cerapachys</i>     | 5                        | 1, 2, 3, 4, 6                                                |                                     |
| <i>Crematogaster</i>  | 7                        | 1, 2, 3, 6, 7, 8, 9                                          |                                     |
| <i>Diacamma</i>       | 2                        | 1, 2                                                         |                                     |
| <i>Dinomyrmex</i>     | 1                        | 1                                                            |                                     |
|                       | <i>Dinomyrmex sp.1</i>   | <i>gigas</i>                                                 | Mickal Houadria                     |
| <i>Dolichoderus</i>   | 4                        | 1, 2, 3, 4                                                   |                                     |
| <i>Dorylus</i>        | 1                        | 1                                                            |                                     |
| <i>Dyscothyrea</i>    | 1                        | 1                                                            |                                     |
| <i>Ectomomyrmex</i>   | 1                        | 1                                                            |                                     |
| <i>Epelysidris</i>    | 1                        | 1                                                            |                                     |
|                       | <i>Epelysidris sp.1</i>  | <i>brocha</i>                                                | Florian Menzel; Fayle et al. (2014) |
| <i>Euponera</i>       | 1                        | 1                                                            |                                     |
| <i>Euprenolepis</i>   | 4                        | 1, 2, 4, 7                                                   |                                     |
| <i>Eurhopalothrix</i> | 3                        | 1, 2, 3                                                      |                                     |
| <i>Gauromyrmex</i>    | 1                        | 1                                                            |                                     |
| <i>Gnamptogenys</i>   | 4                        | 1, 3, 4, 6                                                   |                                     |
| <i>Hypoponera</i>     | 13                       | 2, 4, 5, 6, 7, 8, 11, 12, 13, 14, 15, 17, 18                 |                                     |
| <i>Leptogenys</i>     | 4                        | 1, 2, 4, 6                                                   |                                     |
| <i>Lophomyrmex</i>    | 3                        | 1, 2, 4                                                      |                                     |
|                       | <i>Lophomyrmex sp. 1</i> | <i>bedoti</i>                                                | Florian Menzel; Rigato (1994)       |
|                       | <i>Lophomyrmex sp. 2</i> | <i>longicornis</i>                                           | Florian Menzel; Rigato (1994)       |
| <i>Mayriella</i>      | 1                        | 1                                                            |                                     |
| <i>Mesoponera</i>     | 2                        | 1, 2                                                         |                                     |
| <i>Monomorium</i>     | 3                        | 1, 2, 3                                                      |                                     |
| <i>Myopias</i>        | 1                        | 1                                                            |                                     |
| <i>Myrmecina</i>      | 1                        | 2                                                            |                                     |
| <i>Myrmicaria</i>     | 2                        | 1, 3                                                         |                                     |
| <i>Myrmoteras</i>     | 1                        | 1                                                            |                                     |
| <i>Mystrium</i>       | 1                        | 1                                                            |                                     |
| <i>Nylanderia</i>     | 3                        | 3, 4, 10                                                     |                                     |
| <i>Odontomachus</i>   | 2                        | 1, 2                                                         |                                     |
| <i>Odontoponera</i>   | 2                        | 1, 2                                                         |                                     |
| <i>Parvaponera</i>    | 1                        | 1                                                            |                                     |

|                        |    |                                                                                                       |
|------------------------|----|-------------------------------------------------------------------------------------------------------|
| <i>Pheidole</i>        | 33 | 1,2,3,4,5,6,7,8,9,10,11,1<br>4,15,17,18,19,21,22,24,<br>25,26,27,28,29,30,31,32<br>,33,34,35,37,38,40 |
| <i>Polyrachis</i>      | 3  | 1, 2, 3                                                                                               |
| <i>Ponera</i>          | 3  | 1, 3, 5                                                                                               |
| <i>Proatta</i>         | 1  | 1                                                                                                     |
| <i>Proceratium</i>     | 1  | 1                                                                                                     |
| <i>Pseudolasius</i>    | 6  | 1, 2, 4, 5, 6, 8                                                                                      |
| <i>Pseudoneoponera</i> | 1  | 1                                                                                                     |
| <i>Recurvidris</i>     | 5  | 1, 2, 3, 4, 5                                                                                         |
| <i>Solenopsis</i>      | 4  | 1, 4, 1-D, 2-D                                                                                        |
| <i>Strumigenys</i>     | 9  | 1, 2, 3, 4, 5, 6, 7, 8, 9                                                                             |
| <i>Tapinoma</i>        | 2  | 1, 3                                                                                                  |
| <i>Technomyrmex</i>    | 4  | 1, 2, 5, 6                                                                                            |
| <i>Tetramorium</i>     | 17 | 1,2,3,4,5,6,7,8,9,10,11,1<br>3,14,15,16,19,20                                                         |
| <i>Tetraoponera</i>    | 1  | 1                                                                                                     |
| <i>Vollenhovia</i>     | 3  | 1, 3, 4                                                                                               |

---
