# Supplementary material
Source: MDPI journal article supplement (https://www.mdpi.com/1424-2818/13/2/53)

Fig. S1

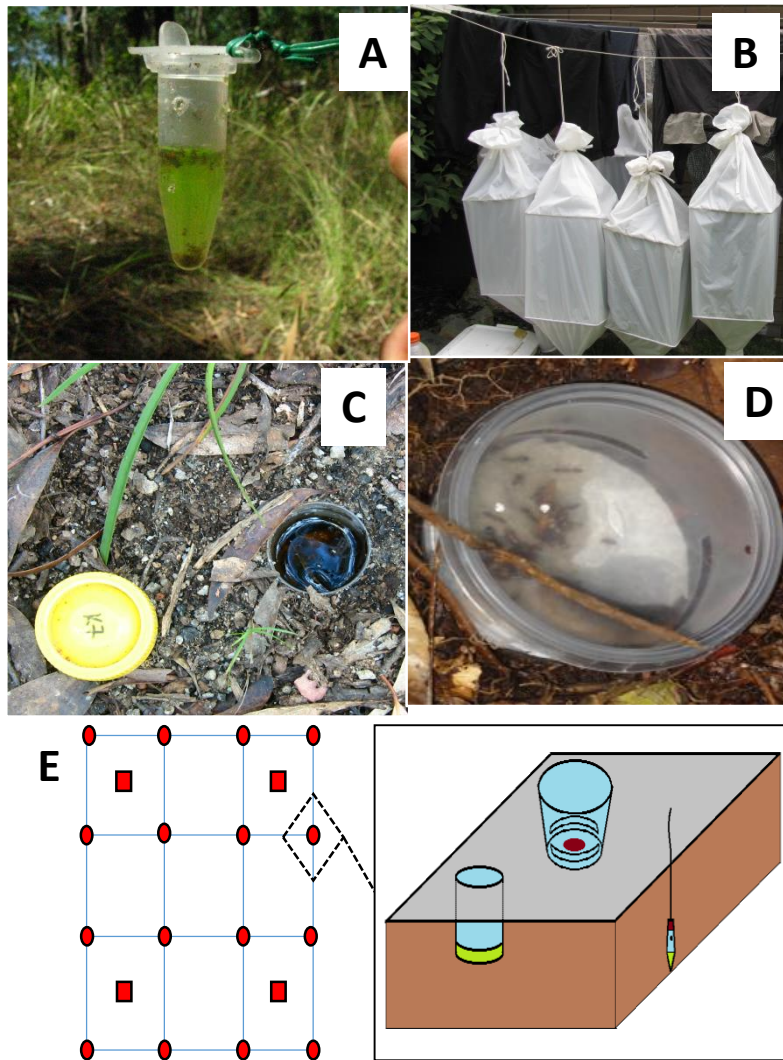

**Fig. S1:** The four different sampling methods used. Photo A represents the 1.5 ml eppendorf tubes with four 3 mm diameter holes and preservative solution (70% ethylene glycol) with ants inside. Baits are presented in the concavity of the cap. Photo B are the Winkler bags with the litter drying inside for 48h. Photo C is a pitfall which is a 4.5 cm diameter plastic specimen jar partly filled with preservative. Photo D is the ground baiting box (10 cm diameter) slightly dug into the soil for the openings to be level with the ground. This one has crushed insects with some *Camponotus* inside just before retrieval. Figure E represents how the different sampling methods were performed within a 4x4 plot. The red squares represent the one square meter litter extraction for Winkler sampling, the red dots represent where all three other sampling methods were performed at different times but at the same location.

## Fig.S2

**Fig. S2:** Venn Diagrams for each site comparing the ant species sampled by the four different baits for both strata. The number on overlapping sections are the number of species common to the different baits concerned, otherwise they are unique to one type of bait. Overall species richness for each method and site is written in brackets. The four upper and four lower Venn diagrams are aboveground and hypogaeic baits, respectively.

Fig.S2

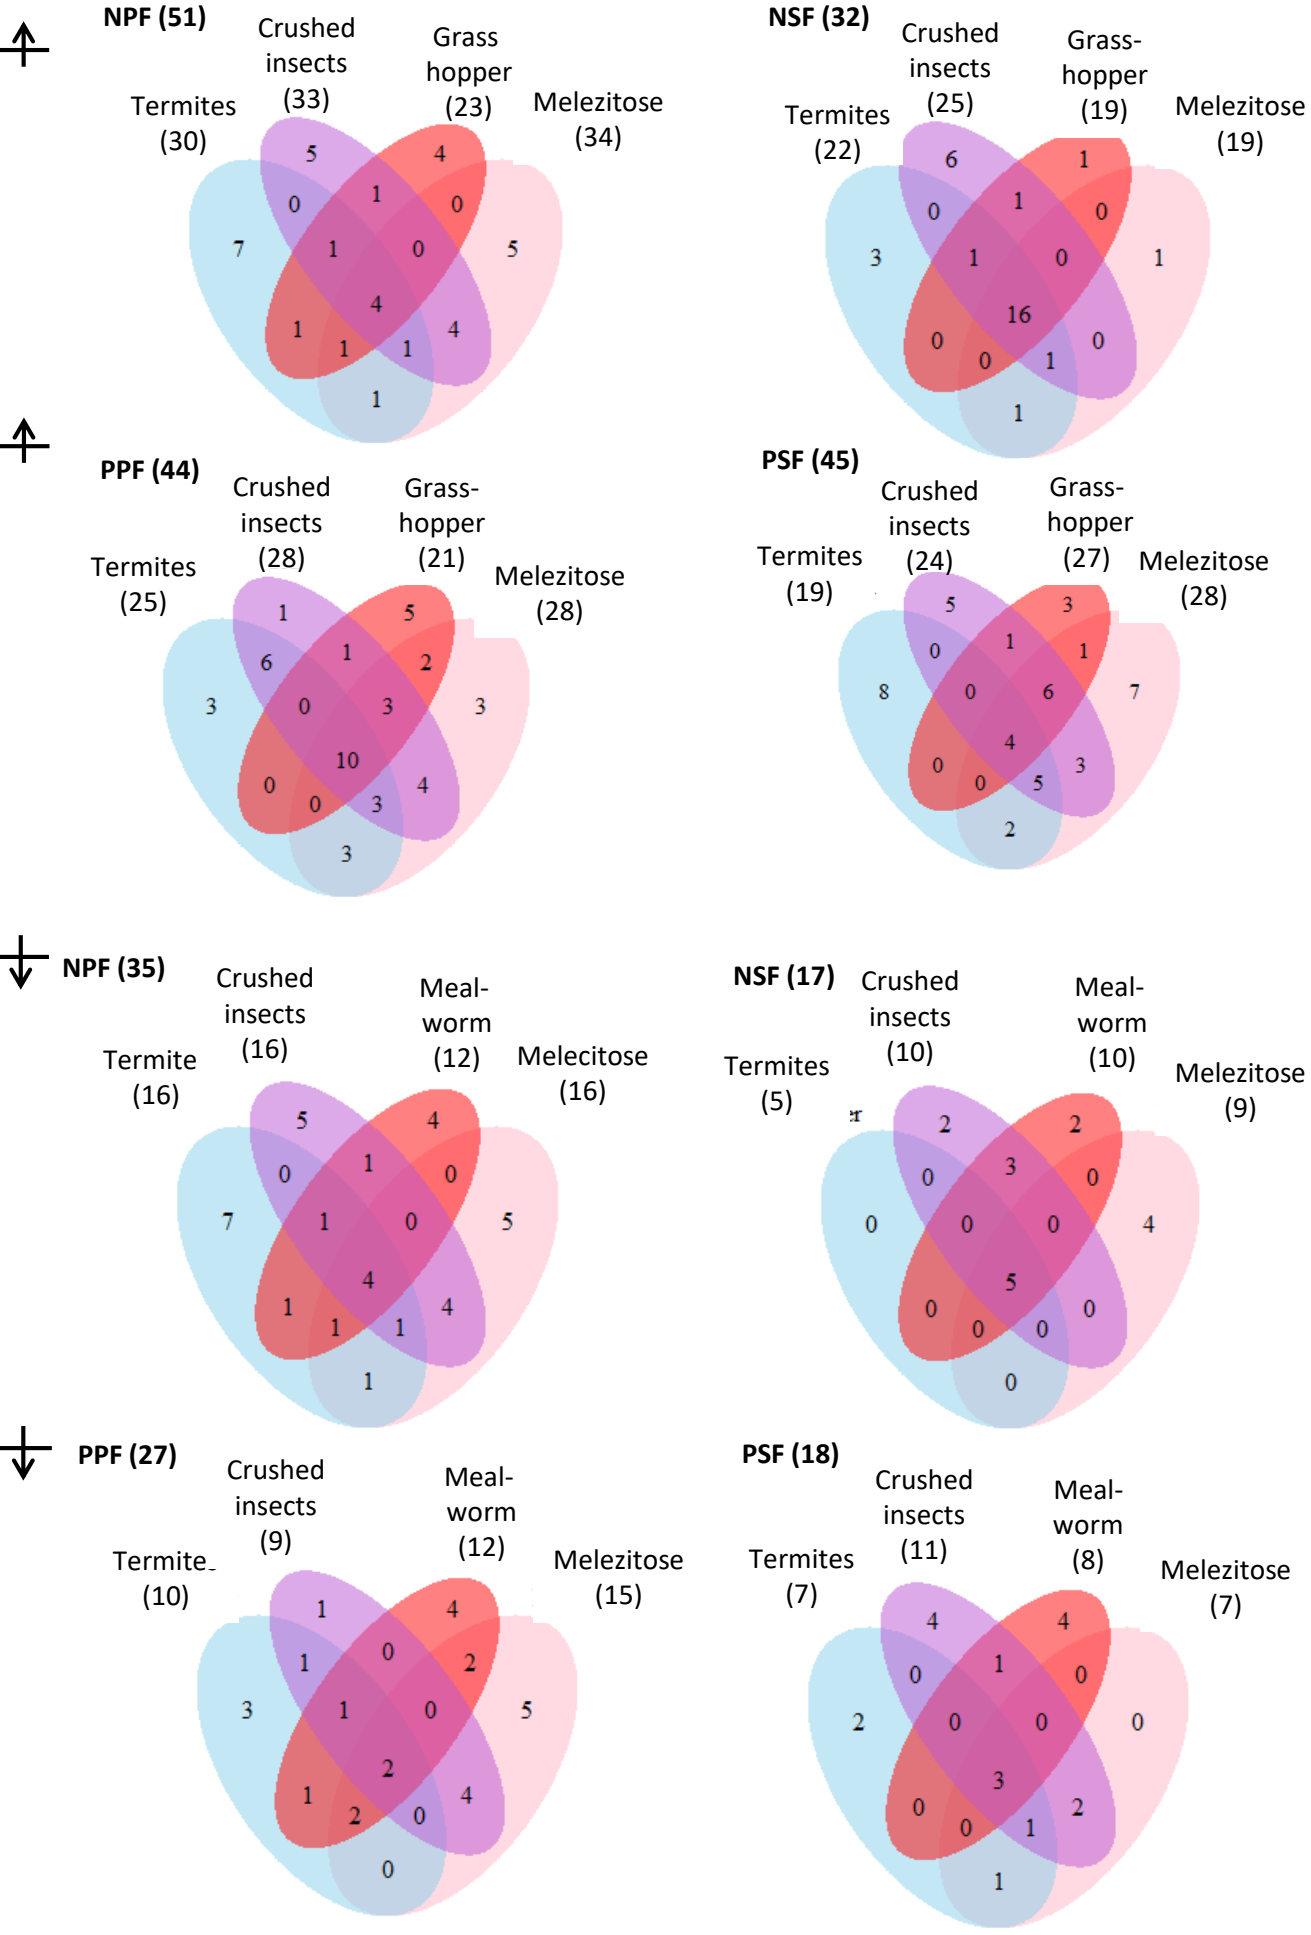

Supplement: s1 [file s1]
