# Supplementary material
Source: MDPI journal article supplement (https://www.mdpi.com/1424-2818/13/2/53)
Supplement: s1 [file s1]

**Table S3** Hypogaeic species. The list provides the species predominantly found in subterranean traps. Only those with at least 5 occurrences at baits are shown. The numbers represent number of occurrences in each sampling type. Except for *Solenopsis* sp. 4 from NPF, all of them were sampled less than 5 times in aboveground baits, pitfalls, or Winkler samples. See also Fig. 5.

|                           | subfamily  | site | subterranean<br>baits | aboveground<br>baits | pitfalls | Winklers |
|---------------------------|------------|------|-----------------------|----------------------|----------|----------|
| <i>Carebara</i> sp. 2     | Myrmicinae | NPF  | 7                     | 1                    | 0        | 0        |
| <i>Brachymyrmex</i> sp.1  | Formicinae | NPF  | 7                     | 0                    | 0        | 0        |
| <i>Hylomyrma</i> sp.1     | Myrmicinae | NPF  | 9                     | 0                    | 0        | 0        |
| <i>Solenopsis</i> sp.4    | Myrmicinae | NPF  | 24                    | 0                    | 9        | 0        |
| <i>Solenopsis</i> sp.5    | Myrmicinae | NPF  | 28                    | 0                    | 3        | 0        |
| <i>Solenopsis</i> sp.8    | Myrmicinae | NPF  | 11                    | 0                    | 1        | 0        |
| <i>Solenopsis</i> sp.13   | Myrmicinae | NPF  | 5                     | 0                    | 3        | 0        |
| <i>Solenopsis</i> sp.2    | Myrmicinae | NSF  | 8                     | 0                    | 0        | 2        |
| <i>Solenopsis</i> sp.3    | Myrmicinae | NSF  | 9                     | 0                    | 0        | 1        |
| <i>Carebara</i> sp. 2     | Myrmicinae | PPF  | 23                    | 2                    | 3        | 0        |
| <i>Epelysidris brocha</i> | Myrmicinae | PPF  | 10                    | 0                    | 0        | 0        |
| <i>Acropyga</i> sp.1      | Formicinae | PPF  | 6                     | 0                    | 0        | 0        |
| <i>Mesoponera</i> sp.1    | Ponerinae  | PPF  | 20                    | 0                    | 4        | 0        |
| <i>Mesoponera</i> sp.1    | Ponerinae  | PSF  | 11                    | 1                    | 0        | 1        |
| <i>Pseudolasius</i> sp.8  | Formicinae | PSF  | 5                     | 0                    | 0        | 0        |
