# Supplementary material
Source: MDPI journal article supplement (https://www.mdpi.com/1424-2818/13/2/53)
Supplement: s1 [file s1]

Archive with 4 entries (4 files):
- sup/Supplementary figures 1-2.pdf
- sup/Supplementary table 3.pdf
- sup/Supplementary tables 1-2.pdf
- sup/Supplementary text 1.pdf
